# Supplementary material
Source: publisher site journal article supplement (https://www.dovepress.com/article/459330)
Supplement: Supplementary file 1 [file get_supplementary_file.php]

**Supplementary Table 1 Combined indexes formula**

| Variables | formula |
| --- | --- |
| dNLR | Neutrophil count(10^9/L)/[White blood cell count(10^9/L)-neutrophil count(10^9/L)] |
| NLR | Neutrophil count (10^9/L)/lymphocyte count (10^9/L) |
| MLR | Monocyte count (10^9/L)/lymphocyte count (10^9/L) |
| PLR | Platelet count (10^9/L)/lymphocyte count (10^9/L) |
| SII | Platelet count (10^9/L) × neutrophil count(10^9/L)/lymphocyte count (10^9/L) |
| SIRI | Neutrophil count (10^9/L)× monocyte count (10^9/L)/lymphocyte count (10^9/L) |
| HALP | Hemoglobin (g/L)×serum albumin (g/L)×lymphocyte count (10^9/L)/platelet count (10^9/L) |

**Supplementary Table 2 Comparisons of characteristics between training set and validation set**

| variables | Training set（n=208） | Validation set (n=85) | *P* |
| --- | --- | --- | --- |
| Age(IQR) | 59.50(36.25-73.00) | 58.00(38.50-72.00) | 0.716 |
| Gender(Male) | 154（74） | 56（65.9） | 0.160 |
| BMI M(IQR) | 19.779(17.631-22.231) | 19.141(17.578-21.022) | 0.305 |
| **Clinlcal symptoms** |  |  |  |
| Fever | 67（32.2） | 24(28.2) | 0.504 |
| Cough | 187（89.9） | 74(87.1) | 0.479 |
| Sputum | 157（75.5） | 64(75.3) | 0.973 |
| Hemoptysis | 30（14.4） | 19(22.4) | 0.099 |
| Night sweats | 20（9.6） | 9(10.6) | 0.800 |
| Weight loss | 60（28.8） | 21(24.7) | 0.472 |
| Chest pain | 31（14.9） | 8(9.4) | 0.209 |
| Dyspnea | 47（22.6） | 22(25.9) | 0.547 |
| Loss of appetite | 34（16.3） | 9(10.6) | 0.206 |
| Fatigue | 40（19.2） | 14(16.5) | 0.580 |
| **Smoking history** | 87（41.8） | 34(40.0) | 0.773 |
| **Driking history** | 50（24） | 26(30.6) | 0.246 |
| **Treatent history** |  |  | 0.678 |
| Initial treatment | 185（88.9） | 77（90.6） |  |
| Retreatment | 23（11.1） | 8（9.4） |  |
| **Underlying disease** |  |  |  |
| DM | 39（18.8） | 16(18.8) | 0.988 |
| HTN | 54（26.0） | 20(23.5) | 0.664 |
| CLD | 52（25.0） | 20(23.5) | 0.791 |
| CKD | 10（4.8） | 3(3.5) | 0.763 |
| CHD | 24（11.5） | 15(17.6) | 0.162 |
| HIV | 0（0.0） | 0（0.0） | - |
| HBV | 21(10.1) | 7(8.1) | 0.603 |
| HCV | 2（1.0） | 1（1.2） | 0.876 |
| **Sputum smear** |  |  |  |
| ≤1+ | 129（62） | 47（55.3） | 0.286 |
| ≥2+ | 79（38） | 38（44.7） |  |
| **GeneXpert MTB/RIF** |  |  |  |
| Negative or weakly positive | 118（56.7） | 45（52.9） | 0.554 |
| >weakly positive | 90（43.3） | 40（47.1） |  |
| T-spot | 139.770(54.865-351.300) | 124.790(36.200-364.720) | 0.437 |

**Supplementary Table 3 Comparisons of Laboratory parameters between training set and validation set**

| variables | Training set（n=208） | Validation set (n=85) | *P* |
| --- | --- | --- | --- |
| WBC(IQR) | 6.500(4.800-8.675) | 6.100(4.550-7.700) | 0.177 |
| Neutrophil count(IQR) | 1.100(0.800-1.400) | 1.200(0.800-1.650) | 0.190 |
| Monocyte count (IQR) | 0.490(0.330-0.670) | 0.470(0.350-0.620) | 0.656 |
| Neutrophil count(IQR) | 4.500(3.125-6.200) | 4.200(3.200-5.900) | 0.492 |
| HB(IQR) | 125.00(113.00-134.00) | 125.00(112.50-137.50) | 0.532 |
| PLT(IQR) | 227.50(166.25-299.50) | 210.00(170.00-255.00) | 0.163 |
| CRP(IQR) | 22.190(4.553-70.372) | 13.360(3.810-59.355) | 0.295 |
| PCT(IQR) | 0.050(0.020-0.100) | 0.050(0.020-0.100) | 0.932 |
| ESR(IQR) | 52.50(25.00-73.00) | 40.00(20.00-63.50) | 0.068 |
| HbA1c(IQR) | 5.800(5.600-6.475) | 5.700(5.400-6.350) | 0.455 |
| TBil(IQR) | 11.000(8.000-15.175) | 11.700(7.550-16.250) | 0.701 |
| ALB(IQR) | 35.100(31.525-39.150) | 35.100(30.500-39.200) | 0.855 |
| ALT(IQR) | 12.00(9.00-21.00) | 12.00(8.00-18.00) | 0.346 |
| AST(IQR) | 18.00（14.00-24.00） | 16.00（13.00-25.00） | 0.253 |
| r-GT(IQR) | 27.00（17.25-49.75） | 22.00（14.00-40.50） | 0.048 |
| ALP(IQR) | 78.00（63.00-94.00） | 77.00（62.00-98.00） | 0.842 |
| LDH(IQR) | 200.00（169.25-252.75） | 192.00（168,50-222.50） | 0.365 |
| Uric acid(IQR) | 280.00（212.50-364.00） | 304.00（224.00-372.50） | 0.671 |
| FBG(IQR) | 4.850（4.215-6.283） | 4.600（4.070-6.025） | 0.230 |
| Scr(IQR) | 65.00（58.00-72.75） | 65.00（57.50-75.00） | 0.995 |
| TC(IQR) | 3.755（3.200-4.360） | 3.570（3.170-4.305） | 0.580 |
| TG(IQR) | 0.8500（0.660-1.168） | 0.920（0.640-1.200） | 0.640 |
| CK(IQR) | 50.50（33.00-75.00） | 52.00（32.00-79.00） | 0.644 |
| Cys(IQR) | 12.000（8.625-15.075） | 12.300（9.800-15.000） | 0.777 |
| PT(IQR) | 11.800（11.200-12.700） | 11.700（11.000-12.450） | 0.302 |
| FIB(IQR) | 3.961（3.032-5.195） | 3.988（3.215-5.085） | 0.794 |
| APTT(IQR) | 30.200（27.500-32.475） | 29.000（26.450-31.550） | 0.059 |
| **Combined indexes** |  |  |  |
| dNLR(IQR) | 2.642(1.817-3.824) | 2.619(1.794-3.634) | 0.770 |
| NLR(IQR) | 4.235(2.543-6.605) | 3.690(2.315-5.655) | 0.160 |
| MLR(IQR) | 0.440(0.280-0.700) | 0.410(0.250-0.655) | 0.346 |
| PLR(IQR) | 199.500(136.356-347.945) | 180.630(133.645-283.750) | 0.130 |
| SII(IQR) | 850.000(516.185-1773.000) | 744.000(480.910-1412.565) | 0.104 |
| SIRI(IQR) | 2.045(0.960-3.988) | 1.890(0.945-2.985) | 0.236 |
| HALP(IQR) | 21.790(11.458-32.798) | 22.720(14.195-38.955) | 0.140 |
